# Supplementary material
Source: Springer Nature journal article supplement (https://www.springermedizin.de/resource/supplementary/12889_2009_2312_MOESM7_ESM.pdf/9485352)

Cost/HIV infection averted

1,000,000,000  
100,000,000  
10,000,000  
1,000,000  
100,000  
10,000  
1,000  
100  
10  
\$1

**HIV prevalence**  
■ > 10%  
■ 5-10 %  
■ 1-5 %  
■ < 1%  
★ Thailand's data

Screening blood products and donated organ for HIV  
Peer education for FSW  
Street outreach  
Male circumcision (HIV prevalence 25.6%)  
STI control  
Introduction of female condom  
Male circumcision (HIV prevalence 8.4%)  
PMTCT with single VCT  
PMTCT with double VCT  
School-based sex education program  
Increased alcohol tax  
Increased condom accessibility  
Provider-initiated VCT at healthcare settings  
Needle and syringe programme  
Mass media campaigns  
Community-based education for MSM  
Using NAT screening of volunteer blood donations  
VCT in prisons  
Mass or community treatment of STI  
Community-based education for low income women

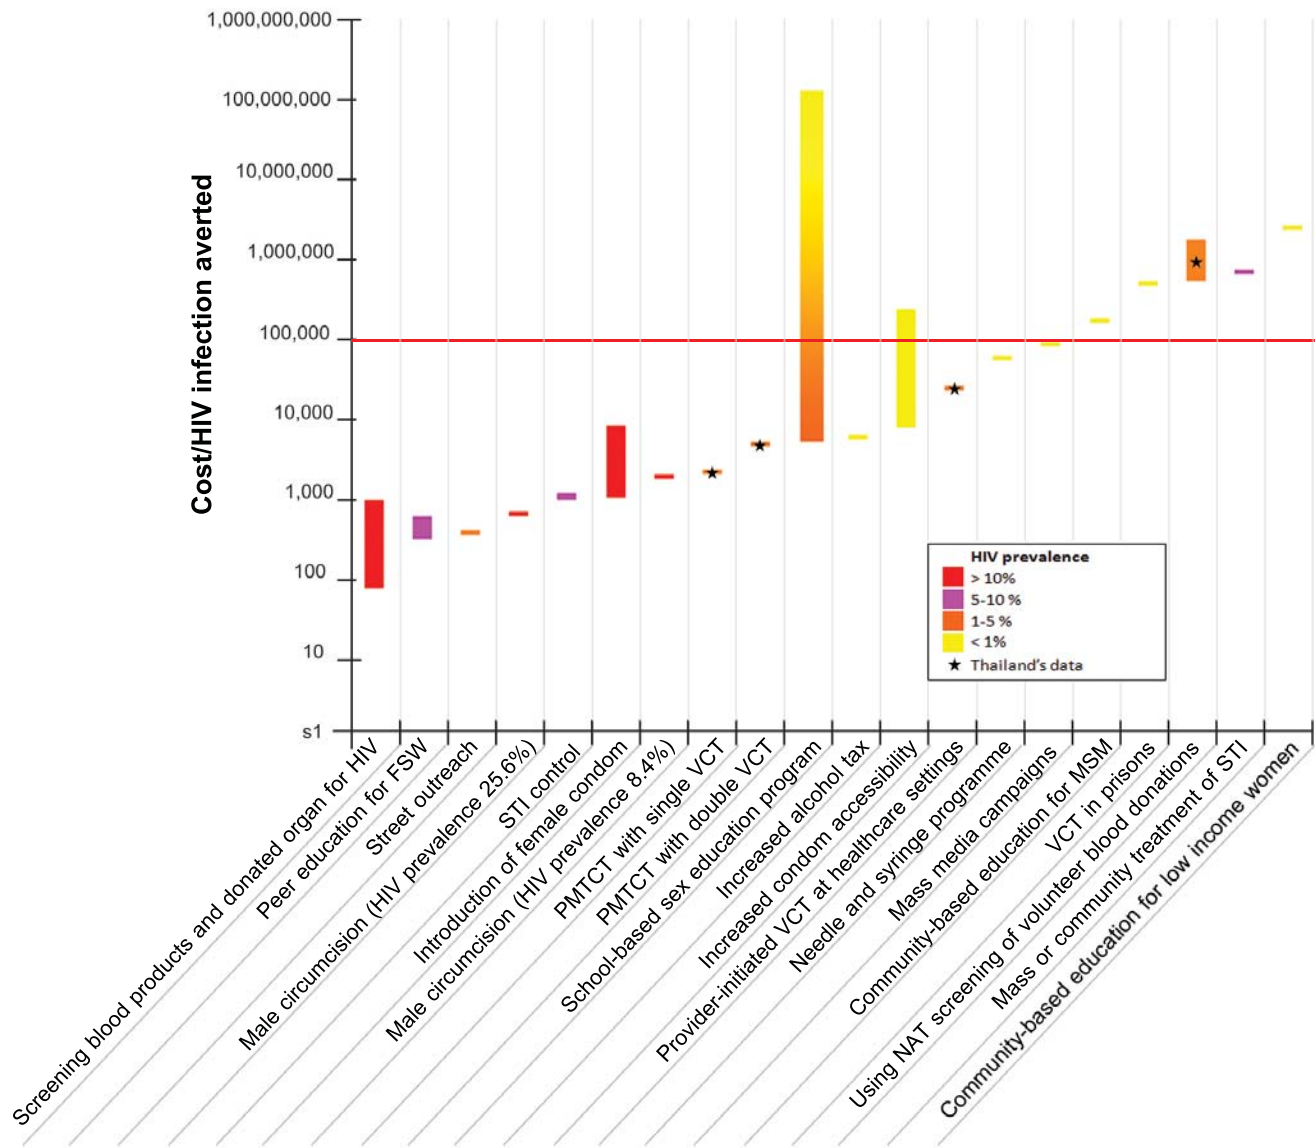

Supplement: MOESM7 [file 9485352]
